# Supplementary material
Source: Springer Nature journal article supplement (https://www.springermedizin.de/resource/supplementary/13256_2011_2164_MOESM4_ESM.pdf/9649152)

**a**

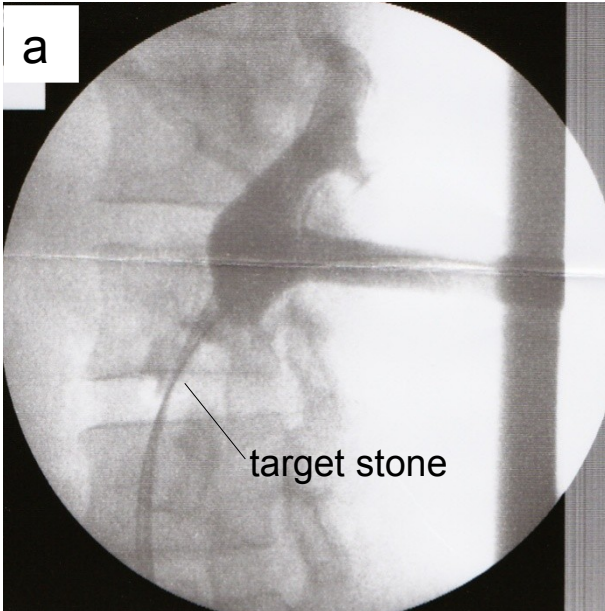

**b**

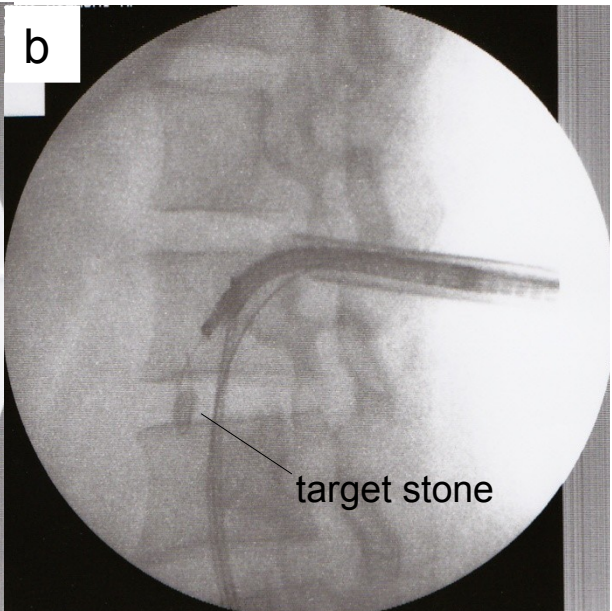

Supplement: MOESM4 [file 9649152]
